# Supplementary material
Source: publisher figshare collection journal article supplement (https://tandf.figshare.com/ndownloader/files/17986178)
Supplement: Supplementary file 1 [file 17986178]

***Supplementary Table 1*** *Detection and identification of phospholipids molecular species from the mussel* Mytilus edulis

| PL | Number | Precursor ion [M-H]- (*m/z*) | Formula (M) | Retention time (min) | Molecular species | Percentage (%) |
| --- | --- | --- | --- | --- | --- | --- |
| PE | 1 | 790.5392 | C45H77O8NP | 12.6 | 18:0/22:6 | 40.8 |
| 2 | 764.5232 | C43H75O8NP | 12.8 | 18:0/20:5 | 15.5 |
| 3 | 762.5080 | C43H73O8NP | 13.2 | 16:0/22:6 | 7.5 |
| 4 | 762.5079 | C43H73O8NP | 13.1 | 18:1/20:5 | 6 |
| 5 | 736.4929 | C41H71O8NP | 13.4 | 16:0/20:5 | 5.9 |
| 6 | 748.5279 | C43H75O7NP | 12.5 | 18:0p/20:5 | 9.9 |
| 7 | 774.5445 | C45H77O7NP | 11.6 | 18:0p/22:6 | 4.4 |
| 8 | 776.5600 | C45H79O7NP | 12.3 | 18:0p/22:5 | 3.2 |
| 9 | 750.5435 | C43H77O7NP | 11.8 | 18:0p/20:4 | 2.8 |
| 10 | 746.5140 | C43H73O7NP | 12.2 | 18:1p/20:5 | 2.3 |
| 11 | 720.4974 | C41H71O7NP | 12.4 | 16:0p/20:5 | 1.7 |
| pPE/PE |  |  |  |  |  | 24.3 |
| PL | Number | Precursor ion [M+HCOO]- (*m/z*) | Formula (M) | Retention time (min) | Molecular species | Percentage (%) |
| PC | 1 | 850.5601 | C47H81O10NP | 28.5 | 16:0/22:6 | 22.6 |
| 2 | 824.5443 | C45H79O10NP | 28.8 | 16:0/20:5 | 15.4 |
| 3 | 852.5759 | C47H83O10NP | 28.1 | 18:0/20:5 | 7.2 |
| 4 | 776.5446 | C41H79O10NP | 28.9 | 16:0/16:1 | 4.6 |
| 5 | 878.5917 | C49H85O10NP | 28.1 | 18:0/22:6 | 3.8 |
| 6 | 826.5603 | C45H81O10NP | 28.3 | 16:0/20:4 | 2.6 |
| 7 | 804.5751 | C43H83O10NP | 28.3 | 16:0/18:1 | 1.9 |
| 8 | 802.5600 | C43H81O10NP | 28.8 | 16:0/18:2 | 1.8 |
| 9 | 876.5759 | C49H83O10NP | 28.4 | 18:1/22:6 | 1.5 |
| 10 | 836.5805 | C47H83O9NP | 27.5 | 16:0e/22:6 | 13.1 |
| 11 | 838.5968 | C47H85O9NP | 27.2 | 18:0e/20:5 | 9.3 |
| 12 | 810.5652 | C45H81O9NP | 27.8 | 16:0e/20:5 | 7.4 |
| 13 | 864.6125 | C49H87O9NP | 27.2 | 18:0e/22:6 | 3.3 |
| 14 | 824.5810 | C46H83O9NP | 27.7 | 17:0e/20:5 | 2.4 |
| 15 | 812.5806 | C45H83O9NP | 27.4 | 16:0e/20:4 | 2.2 |
| 16 | 844.6432 | C47H91O9NP | 27.0 | 16:0e/22:2 | 1.1 |
| aPC/PC |  |  |  |  |  | 38.8 |
